# Supplementary material for: Using storytelling methodology to identify barriers and facilitators of sustained physical activity in patients with a chronic disease: a qualitative study
Source: HighWire-hosted journal article supplement (doi:10.1136/bmjopen-2021-057236), 2022-03-01
Supplement: bmjopen-2021-057236supp001_data_supplement.pdf [file bmjopen-2021-057236supp001_data_supplement.pdf]

**Additional file 1****Consolidated criteria for reporting qualitative studies (COREQ): 32-item checklist**

Developed from: Tong A, Sainsbury P, Craig J. Consolidated criteria for reporting qualitative research (COREQ): a 32-item checklist for interviews and focus groups. *Int J Qual Health C.* 2007; 19(6): 349–357. <http://dx.doi.org/10.1093/intqhc/mzm042>

| Topic                                      | Item no. | Guide question/description                                                                                                                             | Reported on page no.         |
|--------------------------------------------|----------|--------------------------------------------------------------------------------------------------------------------------------------------------------|------------------------------|
| <b>Domain 1: Research team reflexivity</b> |          |                                                                                                                                                        |                              |
| <i>Personal characteristics</i>            |          |                                                                                                                                                        |                              |
| Interviewer/facilitator                    | 1        | Which author/s conducted the interview or focus group?                                                                                                 | Paragraph 2.3                |
| Credentials                                | 2        | What were the researcher's credentials?                                                                                                                | Paragraph 2.3 + chapter 4    |
| Occupation                                 | 3        | What was their occupation at the time of the study                                                                                                     | Chapter 4                    |
| Gender                                     | 4        | Was the researcher male or female?                                                                                                                     | Chapter 4                    |
| Experience and training                    | 5        | What experience or training did the researcher have?                                                                                                   | Paragraph 2.3 + chapter 4    |
| <i>Relationship with participants</i>      |          |                                                                                                                                                        |                              |
| Relationship established                   | 6        | Was a relationship established prior to study commencement?                                                                                            | Chapter 4                    |
| Participant knowledge of the interviewer   | 7        | What did the participants know about the researcher? E.g. personal goals, reasons for doing the research                                               | N/A                          |
| Interviewer characteristics                | 8        | What characteristics were reported about the interviewer? E.g. bias, assumptions, reasons and interests in the research topic                          | Chapter 4                    |
| <b>Domain 2: Study design</b>              |          |                                                                                                                                                        |                              |
| <i>Theoretical framework</i>               |          |                                                                                                                                                        |                              |
| Methodological orientation and Theory      | 9        | What methodological orientation was used to underpin the study? E.g. grounded theory, discourse analysis, ethnography, phenomenology, content analysis | Paragraph 2.1 + 2.5          |
| <i>Participant selection</i>               |          |                                                                                                                                                        |                              |
| Sampling                                   | 10       | How were participants selected? E.g. purposive, convenience, consecutive, snowball                                                                     | Paragraph 2.2                |
| Method of approach                         | 11       | How were participants approached? E.g. face-to-face, telephone, mail, email                                                                            | Paragraph 2.2                |
| Sample size                                | 12       | How many participants were in the study?                                                                                                               | Chapter 3 (table 2)          |
| Non-participation                          | 13       | How many people refused to participate or dropped out? Reasons?                                                                                        | N/A                          |
| <i>Setting</i>                             |          |                                                                                                                                                        |                              |
| Setting of data collection                 | 14       | Where was the data collected? E.g. home, clinic, workplace                                                                                             | Paragraph 2.4                |
| Presence of nonparticipants                | 15       | Was anyone else present besides the participants and researchers?                                                                                      | Paragraph 2.4                |
| Description of sample                      | 16       | What are the important characteristics of the sample? E.g. demographic data                                                                            | Chapter 3 (table 2)          |
| <i>Data collection</i>                     |          |                                                                                                                                                        |                              |
| Interview guide                            | 17       | Were questions, prompts, guides provided by the authors? Was it pilot tested?                                                                          | Paragraph 2.4 + supplement 2 |
| Repeat interviews                          | 18       | Were repeat interviews carried out? If yes, how many?                                                                                                  | N/A                          |
| Audio/visual recording                     | 19       | Did the research use audio or visual recording to collect the data?                                                                                    | Paragraph 2.4                |
| Field notes                                | 20       | Were field notes made during and/or after the interview or focus group?                                                                                | Paragraph 2.4                |

|                                        |    |                                                                                                                                 |                                             |
|----------------------------------------|----|---------------------------------------------------------------------------------------------------------------------------------|---------------------------------------------|
| Duration                               | 21 | What was the duration of the interviews or focus group?                                                                         | Paragraph 2.4                               |
| Data saturation                        | 22 | Was data saturation discussed?                                                                                                  | Chapter 4                                   |
| Transcripts returned                   | 23 | Were transcripts returned to participants for comment and/or correction                                                         | Paragraph 2.6                               |
| <b>Domain 3: analysis and findings</b> |    |                                                                                                                                 |                                             |
| <i>Data analysis</i>                   |    |                                                                                                                                 |                                             |
| Number of data coders                  | 24 | How many data coders coded the data?                                                                                            | Paragraph 2.6                               |
| Description of the coding tree         | 25 | Did authors provide a description of the coding tree?                                                                           | Chapter 3 (Figure 2: represents the themes) |
| Derivation of themes                   | 26 | Were themes identified in advance or derived from the data?                                                                     | Paragraph 2.6 (table 1)                     |
| Software                               | 27 | What software, if applicable, was used to manage the data?                                                                      | Paragraph 2.6 (table 1)                     |
| Participant checking                   | 28 | Did participants provide feedback on the findings?                                                                              | Paragraph 2.6 (table 1)                     |
| <i>Reporting</i>                       |    |                                                                                                                                 |                                             |
| Quotations presented                   | 29 | Were participant quotations presented to illustrate the themes/findings? Was each quotation identified? E.g. participant number | Chapter 3                                   |
| Data and findings consistent           | 30 | Was there consistency between the data presented and the findings?                                                              | Chapter 3                                   |
| Clarity of major themes                | 31 | Were major themes clearly presented in the findings?                                                                            | Chapter 3                                   |
| Clarity of minor themes                | 32 | Is there a description of diverse cases or discussion of minor themes?                                                          | Chapter 3                                   |
