# Supplementary material for: Using storytelling methodology to identify barriers and facilitators of sustained physical activity in patients with a chronic disease: a qualitative study
Source: HighWire-hosted journal article supplement (doi:10.1136/bmjopen-2021-057236), 2022-03-01
Supplement: bmjopen-2021-057236supp003_data_supplement.pdf [file bmjopen-2021-057236supp003_data_supplement.pdf]

### Additional file 3

#### Template stories (in preparation of analysis)

(How are we going to set up the stories (elements and lay-out)?)

##### Title story

Name narrator (fictitious), function/role (patient or function), age:

*"italic the story (date + initials researcher)*

Put optional themes under the story. By doing so you answer the next question: 'what does this story teach me about the research question?'

Lay-out stories- uniformity:

- Colloquial language can be removed when essence of the story stays the same
- Facts can be added
- Write in I-form (instead of 'you fall' etc.)
- The story must be understandable for an outsider

##### **What is a story?**

- Representation of events that are put into order to each other. Narrative of a story:
  - Stands on itself
  - Has a beginning, middle and end
  - Contains narrative elements
  - Evokes emotions or is narrated with emotions
  - Is personal, authentic and true
- Narrative elements:
  - Main character – Who is it about?
  - Supporters- Who/what helped?
  - Opponents- Who/what obstructed?
  - Struggle - What did you struggle with?
  - Plot change – What happened?
  - Time, location, person
